# Supplementary material
Source: Springer Nature journal article supplement (https://www.springermedizin.de/resource/supplementary/12913_2009_998_MOESM3_ESM.pdf/9536102)

### Trajectories of Primary Care Use over 4 Years by Diagnosis Group

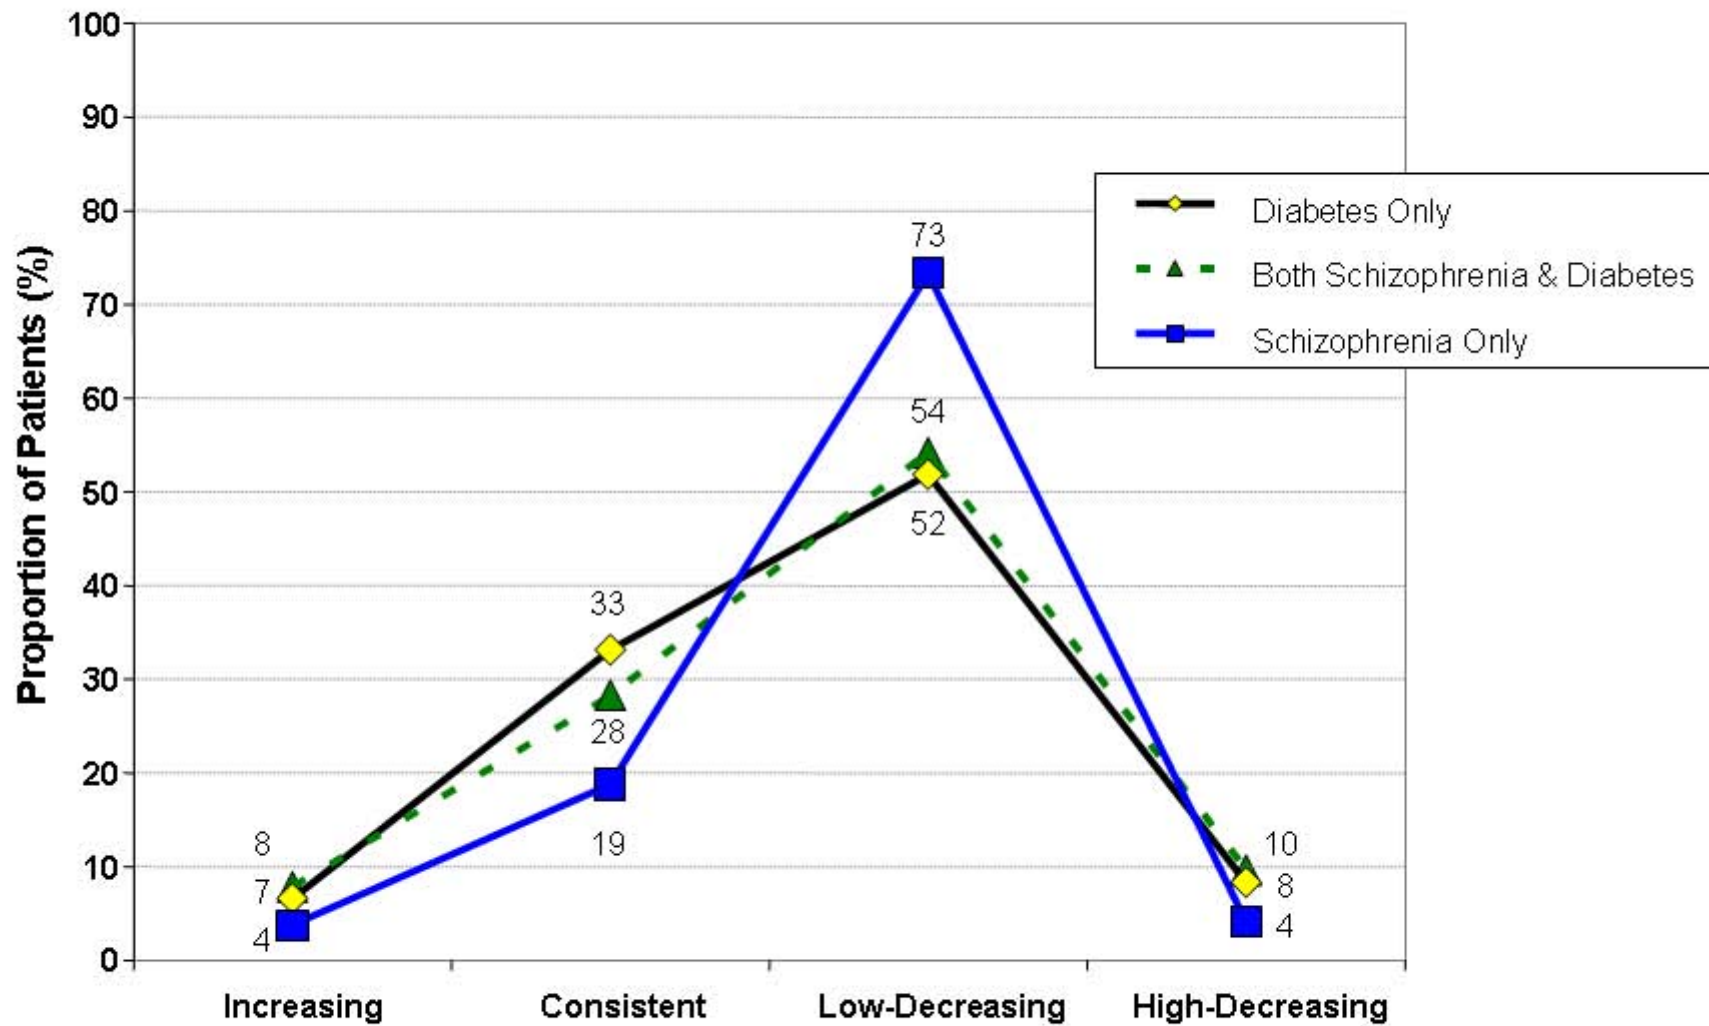

Supplement: MOESM3 [file 9536102]
